# Supplementary material
Source: publisher figshare collection journal article supplement (https://gsapubs.figshare.com/ndownloader/files/33946610)
Supplement: Supplementary file 1 [file 33946610]

## Sheet: Table S4 LuHf
Table S4. Lu–Hf isotopic analyses of zircon
			measured	corrected
Analysis	Domain	Method	176Hf/177Hf	176Hf/177Hf	2SE	176Lu/177Hf	2SE	176Yb/177Hf	2SE	178Hf/177Hf	2SE	180Hf/177Hf	2SE	TotalHfBeam	AGE	176Hf/177Hfi	EHf0	2SE	EHfi
NS2A-12	Magmatic	LA Hf	0.28254	0.282586	2.4e-05	0.001482	7.5e-05	0.0546	0.0021	1.46714	3e-05	1.88685	8.3e-05	20.52	102.1	0.282583	-8.66383	0.849437	-4.87991
NS2A-10	Magmatic	LA Hf	0.282539	0.282585	2.9e-05	0.000933	1e-05	0.03367	0.00061	1.46716	3.6e-05	1.88695	8.9e-05	17.77	102.1	0.282583	-8.69919	1.02641	-4.87827
NS2A-8	Magmatic	LA Hf	0.282538	0.282584	2.7e-05	0.001518	4.7e-05	0.0593	0.0026	1.46718	3.4e-05	1.88691	7.1e-05	17.89	102.1	0.282581	-8.73455	0.955624	-4.95309
NS2A-7	Magmatic	LA Hf	0.282525	0.282571	2.2e-05	0.001047	4.3e-05	0.0405	0.0015	1.46715	3.2e-05	1.88692	9.2e-05	16.92	102.1	0.282569	-9.19426	0.778692	-5.38123
NS2A-9	Magmatic	LA Hf	0.282532	0.282578	2.9e-05	0.001127	1.1e-05	0.04323	0.00029	1.46718	3.6e-05	1.88692	0.00011	19.98	102.1	0.282576	-8.94673	1.02643	-5.13899
SS1-109.1	Magmatic	LA Hf	0.282168	0.282214	2.1e-05	0.0001114	7.3e-06	0.00438	0.00032	1.46716	3.9e-05	1.88691	8.9e-05	14.39	93.8	0.282214	-21.8187	0.744237	-18.1686
SS1-109.2	Magmatic	LA Hf	0.282192	0.282238	2.3e-05	0.0002691	3e-06	0.00962	0.00027	1.46715	3.2e-05	1.88698	8.7e-05	14.29	93.8	0.282237	-20.97	0.815048	-17.3292
SS1-12	Magmatic	LA Hf	0.282112	0.282158	2.9e-05	0.000379	2.2e-05	0.0146	0.00064	1.46716	3.3e-05	1.88683	9.4e-05	20.5	93.8	0.282157	-23.799	1.02796	-20.1659
SS1-121.2	Magmatic	LA Hf	0.282332	0.282378	2.7e-05	0.000619	1.3e-05	0.02011	0.0004	1.46716	3e-05	1.88694	9.9e-05	28.6	93.8	0.282377	-16.0192	0.956321	-12.3979
SS1-10.1	Magmatic	LA Hf	0.282355	0.282401	3e-05	0.0005888	5.7e-06	0.02208	0.0004	1.46714	3.4e-05	1.88698	9.1e-05	20	93.8	0.2824	-15.2059	1.06249	-11.5824
SS1-10.2	Magmatic	LA Hf	0.282373	0.282419	2.5e-05	0.0006722	5.4e-06	0.02521	0.00051	1.46717	3.4e-05	1.88698	8.1e-05	19.76	93.8	0.282418	-14.5694	0.885354	-10.9508
SS1-6	Magmatic	LA Hf	0.282311	0.282357	4.5e-05	0.000331	3.2e-05	0.0138	0.0012	1.46718	3.5e-05	1.88712	0.00011	19.8	93.8	0.282356	-16.7619	1.59399	-13.1233
SS1-14.1b	Magmatic	LA Hf	0.282283	0.282329	4.1e-05	0.00042	0.0001	0.0137	0.003	1.46712	6.8e-05	1.88704	0.00011	12.43	93.8	0.282328	-17.752	1.45244	-14.1192
SS1-14.1a	Pre-magmatic	LA Hf	0.281871	0.281917	3.5e-05	0.000421	1.3e-05	0.01382	0.00045	1.46715	5.2e-05	1.88686	9e-05	17.23	n.d.	n.d.	-32.3214	1.2417	n.d.
SS1-9.2	Pre-magmatic	LA Hf	0.282495	0.282541	3.2e-05	0.0003299	8.5e-06	0.01136	0.00041	1.46716	3.6e-05	1.8869	9.7e-05	18.72	130	0.28254	-10.2551	1.13276	-5.77802
SS1-9.1	Pre-magmatic	LA Hf	0.282491	0.282537	2.9e-05	0.000618	3.4e-05	0.02083	0.00097	1.46713	3.1e-05	1.88688	8.7e-05	18.24	130	0.282535	-10.3966	1.02658	-5.9443
SS1-121.1	Pre-magmatic	LA Hf	0.281016	0.281062	2.9e-05	0.000898	1.1e-05	0.02998	0.0004	1.46718	3.6e-05	1.88701	7.6e-05	17.12	2395	0.281021	-62.5564	1.03197	-8.10639
NS3A-115	Magmatic	LA Hf	0.282247	0.282293	3.6e-05	0.000708	6e-05	0.0264	0.0019	1.46712	3.6e-05	1.88681	0.00013	19.53	84.3	0.282292	-19.0251	1.27548	-15.584
NS3A-110	Magmatic	LA Hf	0.282231	0.282277	3.6e-05	1.55e-05	4.6e-06	0.00066	0.00018	1.46717	4.3e-05	1.88692	9.8e-05	14.37	84.3	0.282277	-19.5909	1.27555	-16.1116
NS3A-16	Magmatic	LA Hf	0.282305	0.282351	3e-05	0.00018	2.7e-05	0.0065	0.00089	1.46719	4.1e-05	1.8869	0.00011	14.19	84.3	0.28235	-16.974	1.06268	-13.503
NS3A-15	Magmatic	LA Hf	0.282182	0.282228	1.9e-05	5.79e-05	3.9e-06	0.00231	0.00022	1.46717	2.9e-05	1.88685	7e-05	16.21	84.3	0.282228	-21.3236	0.673324	-17.8473
NS3A-11	Magmatic	LA Hf	0.282213	0.282259	2.9e-05	0.0001714	4.8e-06	0.00582	0.00016	1.46715	4.4e-05	1.88678	8.3e-05	13.21	84.3	0.282258	-20.2274	1.02759	-16.757
NS3A-114	Magmatic	LA Hf	0.282278	0.282324	4e-05	0.000656	4.2e-05	0.0257	0.0012	1.4672	5.5e-05	1.88692	0.00014	20.98	84.3	0.282323	-17.9288	1.41704	-14.4845
TUNG_27.1	Magmatic	LASS	0.282089	0.282125	3.6e-05	0.00187	0.00016	0.0788	0.0076	1.46717	6.5e-05	1.88692	0.00015	11.92	70.5	0.282123	-24.6123	1.27619	-21.8639
TUNG_108	Magmatic	LASS	0.282096	0.282132	3.8e-05	0.00236	4e-05	0.1046	0.0015	1.46716	5.1e-05	1.88706	0.00013	7.87	70.5	0.282129	-24.3648	1.34706	-21.6391
TUNG_26	Magmatic	LASS	0.282096	0.282132	2.9e-05	0.000482	5.5e-05	0.0195	0.0024	1.46718	4.3e-05	1.88699	0.0001	10.82	70.5	0.282131	-24.3648	1.02802	-21.5516
TUNG_25.23	Magmatic	LASS	0.282101	0.282137	3e-05	0.00203	0.00014	0.0817	0.0058	1.46721	3.8e-05	1.88694	0.00011	9.41	70.5	0.282134	-24.188	1.06345	-21.4468
TUNG_5.1	Magmatic	LASS	0.282104	0.28214	4e-05	0.000696	2.4e-05	0.0293	0.0012	1.46718	4.7e-05	1.88684	0.00013	8.62	70.5	0.282139	-24.0819	1.41792	-21.2786
TUNG_335	Magmatic	LASS	0.282121	0.282157	3.8e-05	0.001739	6.4e-05	0.0723	0.0034	1.46721	4.5e-05	1.88698	9.6e-05	8.33	70.5	0.282155	-23.4807	1.34694	-20.7258
TUNG_352R	Magmatic	LASS	0.282121	0.282157	4e-05	0.000812	7.7e-05	0.0344	0.003	1.46716	4.4e-05	1.88701	0.00012	10.44	70.5	0.282156	-23.4807	1.41783	-20.6826
TUNG_16	Magmatic	LASS	0.282124	0.28216	3.5e-05	0.002	5.9e-05	0.0865	0.0025	1.46717	6e-05	1.88681	0.00015	9.25	70.5	0.282157	-23.3746	1.24059	-20.6319
TUNG_336R	Magmatic	LASS	0.282127	0.282163	4.3e-05	0.001616	9.2e-05	0.0705	0.0042	1.4672	3.4e-05	1.8869	8.8e-05	9.93	70.5	0.282161	-23.2686	1.52414	-20.5079
TUNG_123.2	Magmatic	LASS	0.282129	0.282165	4e-05	0.00284	0.0001	0.1253	0.001	1.4672	4.2e-05	1.88692	0.00014	20.25	70.5	0.282161	-23.1978	1.41779	-20.4941
TUNG_9	Magmatic	LASS	0.28214	0.282176	3.9e-05	0.001624	1.8e-05	0.07303	0.00079	1.4672	4.5e-05	1.88701	0.00013	8.05	70.5	0.282174	-22.8088	1.38229	-20.0484
TUNG_401	Magmatic	LASS	0.28216	0.282196	3.2e-05	0.004468	2e-05	0.22214	0.00081	1.46721	3.4e-05	1.88698	0.0001	14.35	70.5	0.28219	-22.1016	1.13411	-19.4734
TUNG_329.2	Magmatic	LASS	0.282177	0.282213	3.6e-05	0.00264	0.00019	0.1203	0.0097	1.4672	4.2e-05	1.88685	9.7e-05	9.61	70.5	0.28221	-21.5004	1.27579	-18.7869
TUNG_12	Pre-magmatic	LASS	0.282039	0.282075	4e-05	0.000234	2.3e-05	0.01017	0.0008	1.46722	4e-05	1.88688	0.00011	10.11	86	0.282075	-26.3805	1.41824	-23.2151
TUNG_13	Mix	LASS	0.281957	0.281993	3.6e-05	0.000786	2.2e-05	0.03117	0.00055	1.46718	4.2e-05	1.88693	0.00015	10.75	85	0.281992	-29.2802	1.27679	-26.1687
TUNG_105.1	Jurassic-Cretaceous	LASS	0.282043	0.282079	3e-05	2.985e-05	8.4e-07	0.001807	3.7e-05	1.46718	3.7e-05	1.88692	0.0001	11.01	160	0.282079	-26.239	1.06367	-21.4213
TUNG_111	Jurassic	LASS	0.282213	0.282249	4.3e-05	0.000447	4.9e-05	0.0183	0.0023	1.46717	4.6e-05	1.88692	0.00016	8.06	150	0.282248	-20.2274	1.52367	-15.6702
TUNG_2.2	Jurassic	LASS	0.282452	0.282488	3.2e-05	0.000903	1.7e-05	0.03508	0.00081	1.46719	2.9e-05	1.88704	9.2e-05	17.57	158	0.282485	-11.7757	1.13294	-7.08672
TUNG_4.67	Mix	LASS	0.281825	0.281861	3e-05	0.000829	3.9e-05	0.0323	0.0018	1.46719	3.5e-05	1.88698	8.6e-05	10.57	316	0.281856	-33.9481	1.06449	-25.8362
TUNG_352.1	Mix	LASS	0.28198	0.282016	4.4e-05	0.000214	2.7e-05	0.0089	0.001	1.46715	4.3e-05	1.88701	0.00012	10.17	374	0.282015	-28.4669	1.56039	-18.9365
TUNG_203.2	Pre-magmatic	LASS	0.282145	0.282181	3.8e-05	0.00077	8.5e-05	0.0305	0.0036	1.46718	4.3e-05	1.88698	0.00011	14.22	979	0.282167	-22.632	1.34683	0.0573165
TUNG_203.1	Pre-magmatic	LASS	0.282176	0.282212	2.6e-05	0.000699	4.8e-05	0.0282	0.0016	1.46718	3.9e-05	1.88699	8.6e-05	11.94	1028.2	0.282198	-21.5358	0.921411	2.2941
TUNG_106	Pre-magmatic	LASS	0.282111	0.282147	4.6e-05	0.001037	2e-05	0.0484	0.0011	1.46716	5e-05	1.88691	0.00013	5.4	1145.4	0.282125	-23.8344	1.63056	2.33558
TUNG_25.1	Pre-magmatic	LASS	0.282078	0.282114	3.4e-05	0.001821	7.2e-05	0.0809	0.0035	1.46721	5.1e-05	1.88698	0.00013	7.43	1240.1	0.282071	-25.0013	1.20534	2.60211
TUNG_355	Pre-magmatic	LASS	0.28137	0.281406	2.8e-05	0.0001395	1.7e-06	0.00657	0.0001	1.46718	4e-05	1.88699	8.8e-05	12.56	1668.7	0.281402	-50.038	0.995131	-11.366
TUNG_104.1	Pre-magmatic	LASS	0.281498	0.281534	3e-05	0.000273	1.8e-05	0.01333	0.00063	1.46719	5.2e-05	1.88687	0.00013	12.21	1675.7	0.281525	-45.5116	1.06573	-6.81252
TUNG_201.1	Pre-magmatic	LASS	0.281416	0.281452	2.6e-05	0.0001883	3.5e-06	0.00907	0.00011	1.46718	3.2e-05	1.88697	8e-05	13.01	1677.9	0.281446	-48.4113	0.923899	-9.57785
TUNG_336.1	Pre-magmatic	LASS	0.281333	0.281369	3.9e-05	0.0008305	8.3e-06	0.03185	0.00029	1.46717	3.6e-05	1.88692	0.0001	9.81	2018.4	0.281337	-51.3464	1.38626	-5.59996
TUNG_123.1	Pre-magmatic	LASS	0.281422	0.281458	4.2e-05	0.001018	1.5e-05	0.04145	0.00068	1.4672	6.6e-05	1.88692	0.0001	12.79	2042.5	0.281418	-48.1992	1.49242	-2.15286
TUNG_329.1	Pre-magmatic	LASS	0.281358	0.281394	3.7e-05	0.000616	6.9e-05	0.0265	0.003	1.46719	4.4e-05	1.88689	9.2e-05	9.88	2306.1	0.281367	-50.4624	1.31505	2.13547
TUNG_4.1	Pre-magmatic	LASS	0.28133	0.281366	3.4e-05	0.001629	5.6e-05	0.0672	0.0027	1.46719	3.4e-05	1.88689	8.9e-05	10.42	2353	0.281293	-51.4525	1.20855	0.595165
TUNG_201.2	Pre-magmatic	LASS	0.28123	0.281266	2.9e-05	0.0008697	8.8e-06	0.03444	0.00035	1.46721	3.9e-05	1.88707	0.00011	10.46	2403.9	0.281226	-54.9888	1.03118	-0.592237
SECONDARY STANDARDS
plesovice_1	Std.	LASS		0.28247	6.8e-05	5.72e-05	2.3e-07	0.003353	1.8e-05	1.46719	5e-05	1.88691	0.0002	14.68	337	0.28247
plesovice_2	Std.	LASS		0.282447	5.3e-05	6.261e-05	1.9e-07	0.003748	1.8e-05	1.46717	3.7e-05	1.88699	0.00015	14.11	337	0.282447
plesovice_3	Std.	LASS		0.282414	7.6e-05	0.00010888	4.3e-07	0.006312	2.2e-05	1.46716	5.8e-05	1.88716	0.00022	13.41	337	0.282414
plesovice_4	Std.	LASS		0.2824	0.00011	8.72e-05	1.2e-06	0.005221	6.2e-05	1.46712	7.4e-05	1.88704	0.00032	13.1	337	0.2824
plesovice_5	Std.	LASS		0.282429	7.6e-05	0.0001084	1.3e-06	0.006391	7.4e-05	1.46718	3.8e-05	1.88704	0.00023	13.44	337	0.282429
plesovice_6	Std.	LASS		0.28242	6.8e-05	0.00013054	1.9e-07	0.007705	2.2e-05	1.46712	4.3e-05	1.8871	0.0002	14.72	337	0.28242
plesovice_7	Std.	LASS		0.282389	6.2e-05	0.00012135	1.6e-07	0.007146	3.3e-05	1.46717	5.5e-05	1.88699	0.00022	14.45	337	0.282389
plesovice_8	Std.	LASS		0.282412	8.2e-05	0.00011099	2e-07	0.006539	3.7e-05	1.46717	5.5e-05	1.88695	0.00026	15.24	337	0.282412
plesovice_9	Std.	LASS		0.282439	8.7e-05	0.000147	2.1e-06	0.00844	0.00014	1.46715	5.8e-05	1.887	0.00027	13.26	337	0.282439
plesovice_10	Std.	LASS		0.282477	8.2e-05	0.00014219	5.3e-07	0.00826	6e-05	1.46717	5.6e-05	1.88696	0.00025	14.11	337	0.282477
plesovice_11	Std.	LASS		0.282379	6.7e-05	0.00011223	1.5e-07	0.006563	3e-05	1.46714	4.8e-05	1.88713	0.00022	14.6	337	0.282379
plesovice_12	Std.	LASS		0.282443	4.9e-05	0.00010307	1.6e-07	0.005952	2.8e-05	1.46715	4.5e-05	1.88696	0.00017	14.98	337	0.282443
plesovice_13	Std.	LASS		0.282436	7.9e-05	0.00013926	4.3e-07	0.008078	4.9e-05	1.46718	5.5e-05	1.88695	0.00024	14.73	337	0.282436
plesovice_14	Std.	LASS		0.282459	7.7e-05	0.00015216	1.9e-07	0.008846	2.2e-05	1.46719	4.4e-05	1.88696	0.00022	14.75	337	0.282458
plesovice_15	Std.	LASS		0.282496	6.5e-05	0.00013734	2.7e-07	0.007995	3.9e-05	1.46717	4.6e-05	1.88679	0.00021	14.37	337	0.282496
plesovice_16	Std.	LASS		0.282492	6.7e-05	0.00011435	1.7e-07	0.006658	3.9e-05	1.46719	4.7e-05	1.8869	0.00023	14.45	337	0.282492
plesovice_17	Std.	LASS		0.282438	6.8e-05	0.00013366	2.9e-07	0.007798	4.7e-05	1.46716	5e-05	1.88705	0.00021	15.21	337	0.282438
plesovice_18	Std.	LASS		0.282462	7.4e-05	0.00010237	1.5e-07	0.005971	3.6e-05	1.46714	5.1e-05	1.88697	0.00023	15.26	337	0.282462
plesovice_19	Std.	LASS		0.282471	7.4e-05	0.00010591	1.4e-07	0.006118	3.3e-05	1.46718	4.4e-05	1.88697	0.00023	15.42	337	0.282471
plesovice_20	Std.	LASS		0.282481	7.3e-05	0.00013349	5.6e-07	0.007653	6.1e-05	1.46717	5e-05	1.88682	0.00024	14.61	337	0.282481
plesovice_21	Std.	LASS		0.282463	7e-05	0.00011812	2.2e-07	0.00678	3.4e-05	1.46715	5.3e-05	1.887	0.00021	14.89	337	0.282463
plesovice_22	Std.	LASS		0.282478	8.2e-05	0.00012941	3.3e-07	0.007372	4.2e-05	1.46721	4.7e-05	1.88684	0.00026	14.37	337	0.282478
plesovice_23	Std.	LASS		0.282455	5e-05	0.0001295	1.2e-06	0.007367	6e-05	1.46716	4.5e-05	1.88711	0.00015	13.9	337	0.282455
plesovice_24	Std.	LASS		0.28243	7.5e-05	0.0001143	1.3e-06	0.006551	7.2e-05	1.46714	4.5e-05	1.88703	0.0002	13.28	337	0.28243
plesovice_25	Std.	LASS		0.282479	5.1e-05	6.025e-05	6.7e-07	0.00352	5.4e-05	1.46719	4.3e-05	1.88692	0.00016	13.29	337	0.282479
plesovice_26	Std.	LASS		0.282486	7.7e-05	9.349e-05	3.8e-07	0.005344	3.3e-05	1.46719	5.1e-05	1.88695	0.00022	13.12	337	0.282486
fc1_1	Std.	LASS		0.282102	3.1e-05	0.000845	2e-05	0.03638	0.00091	1.4672	4.4e-05	1.887	0.00012	10.71	1099	0.282085
fc1_2	Std.	LASS		0.282148	4.5e-05	0.0009152	7.6e-06	0.03818	0.00051	1.46719	5.6e-05	1.8869	0.00013	8.88	1099	0.282129
fc1_3	Std.	LASS		0.282143	2.7e-05	0.0009932	3e-06	0.043	0.00028	1.46718	4e-05	1.88701	8.9e-05	9.97	1099	0.282123
fc1_4	Std.	LASS		0.28215	3.1e-05	0.0008945	2.7e-06	0.03885	0.00028	1.46719	3.5e-05	1.88696	0.00011	10.88	1099	0.282132
fc1_6	Std.	LASS		0.282171	3.1e-05	0.001051	1e-05	0.04545	0.00059	1.46719	2.8e-05	1.88696	9e-05	13.27	1099	0.28215
fc1_7	Std.	LASS		0.282148	2.4e-05	0.000971	1.4e-05	0.04238	0.00086	1.46718	3.1e-05	1.88701	7e-05	15.81	1099	0.282128
fc1_8	Std.	LASS		0.282194	2.7e-05	0.001685	5.4e-05	0.0757	0.0028	1.46719	3e-05	1.88699	8.6e-05	14.79	1099	0.282159
fc1_9	Std.	LASS		0.28218	2.6e-05	0.0014574	4.7e-06	0.06406	0.00016	1.4672	4.7e-05	1.88692	0.0001	10.43	1099	0.28215
fc1_10	Std.	LASS		0.282158	3.1e-05	0.0013438	6.3e-06	0.05893	7.4e-05	1.46716	4.4e-05	1.88696	0.00012	10.57	1099	0.282131
fc1_11	Std.	LASS		0.282187	2.7e-05	0.001529	1.2e-05	0.06613	0.00013	1.4672	4.4e-05	1.88705	9.5e-05	10.51	1099	0.282156
fc1_12	Std.	LASS		0.282146	2.8e-05	0.0010574	8.8e-06	0.04596	0.00076	1.46715	3.9e-05	1.88691	9.8e-05	10.89	1099	0.282124
fc1_13	Std.	LASS		0.282175	3e-05	0.0010059	9.3e-06	0.04357	0.00072	1.4672	3.8e-05	1.88702	0.00011	10.67	1099	0.282155
fc1_14	Std.	LASS		0.282142	3.6e-05	0.0009789	8.6e-06	0.04237	0.00067	1.46719	4.6e-05	1.88702	0.00012	10.84	1099	0.282122

## Sheet: Info
This Supplemental Material accompanies Gottlieb, E.S., Miller, E.L., Valley, J.W.,
Fisher, C.M., Vervoort, J.D., and Kitajima, K., 2022, Zircon petrochronology of Cretaceous
Cordilleran interior granites of the Snake Range and Kern Mountains, Nevada, USA,
in Craddock, J.P., Malone, D.H., Foreman, B.Z., and Konstantinou, A., eds., Tectonic Evolution
of the Sevier-Laramide Hinterland, Thrust Belt, and Foreland, and Postorogenic Slab Rollback
(180–20 Ma): GSA Special Paper 555, https://doi.org/10.1130/2022.2555(02).
